# Supplementary material
Source: publisher site journal article supplement (https://www.dovepress.com/article/475073)

| **Table A1. Clinical characteristics of bloodstream infection with *Acinetobacter baumannii*. (30-day survival and 30-day mortality groups).** | | | |
| --- | --- | --- | --- |
| N (Total=200) | 30-day survival (N=164) | 30-day mortality (N=36) | *P* Value |
| Age (years) | 63(51-75) | 58.5(46.5-58.5) | 0.532 |
| BMI (Kg/m2) | 23.24(20.96-25.85) | 23.14(21.28-23.14) | 0.91 |
| Sex |  |  | 0.569 |
| Male | 105(62.2%) | 25(69.9%) |  |
| Female | 59(37.8%) | 11(30.1%) |  |
| ICU admission | 66(37.8%) | 12(41.1%) | 0.571 |
| Mechanical ventilation | 37(19.7%) | 7(26%) | 0.825 |
| Length of ICU stay (days) | 8.5(0-29.25) | 9.5(0-9.5) | 0.445 |
| Length of hospital stay (days) | 48(30.75-72) | 18(10.5-18) | <0.0001 |
| CRP (mg/L) | 78(36-214.85) | 154(34.5-154) | 0.0371 |
| PCT (ng/mL) | 1(0.4-13.7) | 1.9(0.58-1.9) | 0.1152 |
| Scr (μmol/L) | 83(58-209.25) | 99.5(77.75-99.5) | 0.0267 |
| ESR (mm/h) | 31(12-26.75) | 17.5(7.5-17.5) | 0.1751 |
| WBC (x10^9/L) | 9.2(6.39-16.97) | 12.6(9.65-12.6) | 0.001 |
| Neutrophils (x10^9/L) | 8.05(5.56-16.59) | 12.45(8.95-12.45) | <0.0001 |
| Lymphocytes (x10^9/L) | 0.66(0.44-0.94) | 0.57(0.44-0.57) | 0.4167 |
| RBC (x10^12/L) | 2.98(2.53-3.1) | 2.66(2.34-2.66) | 0.0034 |
| HB (g/L) | 88(75-95) | 80(70-80) | 0.1681 |
| LDH (IU/L) | 309.5(229.75-995) | 387(273.5-387) | 0.0956 |
| ALT (IU/L) | 24(15-75.5) | 36(18.5-36) | 0.1941 |
| AST (IU/L) | 38(25-77.5) | 47(28.5-47) | 0.1327 |
| ALB (g/L) | 34.5(31-33.5) | 31(28-31) | 0.0037 |
| Comorbidities |  |  |  |
| Acute kidney injury | 16(9.7%) | 7(19.4%) | 0.143 |
| Acute liver injury | 12(7.3%) | 6(16.6%) | 0.102 |
| Acute myocardial infarction | 4(2.4%) | 3(8.3%) | 0.111 |
| Acute respiratory failure | 11(6.7%) | 1(2.7%) | 0.697 |
| Source of infection |  |  |  |
| Digestive tract | 39(23.7%) | 2(5.5%) | 0.012 |
| Respiratory tract | 44(26.8%) | 17(47.2%) | 0.026 |
| Skin and skin structure | 27(16.4%) | 6(16.6%) | >0.9999 |
| CVC-related infection | 8(4.8%) | 0(0%) | 0.355 |
| Urinary tract | 2(1.2%) | 0(0%) | >0.9999 |
| Antibiotic therapy |  |  |  |
| Imipenem containing-regimen | 87(53.0%) | 11(30.5%) | 0.016 |
| Meropenem containing-regimen | 119(72.5%) | 16(44.4%) | 0.001 |
| Polymyxin containing-regimen | 47(28.6%) | 7(19.4%) | 0.305 |
| Tigecycline containing-regimen | 38(23.2%) | 2(5.5%) | 0.02 |
| Cefoperazone and Sulbactam containing-regimen | 70(42.7%) | 4(11.1%) | 0.0002 |

CRP: C-reactive protein, PCT: Procalcitonin, Scr: serum creatinine, ESR: erythrocyte sedimentation Rate, WBC: white blood cells, LDH: lactic acid dehydrogenase, RBC: red blood cell, HB: Hemoglobin, ALT: glutamic pyruvic transaminase, AST: aspartate transaminase, ALB: albumin.

**Figure A2. The comparisons of some clinical characteristics of bloodstream infection with *Acinetobacter baumannii* in 30-day survival and 30-day mortality group. * p<0.05, ** p<0.01, *** p<0.001.**


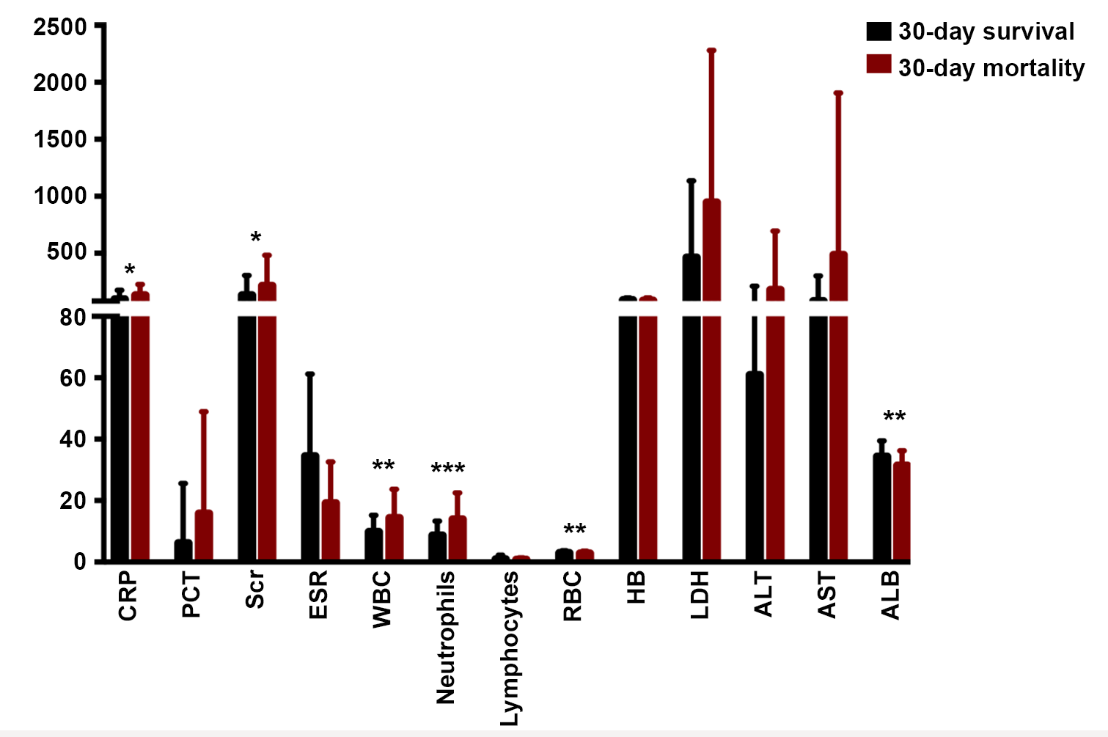


| **Table A3. Clinical characteristics of bloodstream infection with *Acinetobacter baumannii* in internal medical patients (30-day survival and 30-day mortality groups)** | | | |
| --- | --- | --- | --- |
| N (Total=65) | 30-day survival (N=47) | 30-day mortality (N=18) | *P* Value |
| Age (years) | 67(52-79.5) | 65(53.5-73.75) | 0.587 |
| BMI (Kg/m2) | 22.46(19.53-25.35) | 24.19(21.68-26.69) | 0.267 |
| Sex |  |  | 0.565 |
| Male | 18(38.2%) | 5(27.7%) |  |
| Female | 29(61.7%) | 13(72.2%) |  |
| ICU admission | 18(38.2%) | 6(33.3%) | 0.78 |
| Mechanical ventilation | 11(23.4%) | 17(94.4%) | <0.0001 |
| Length of ICU stay (days) | 25(0-47) | 8(0-18.75) | 0.09 |
| Length of hospital stay (days) | 47.4(30.85-77.72) | 12.05(7.75-22.55) | <0.0001 |
| CRP (mg/L) | 70(37.75-135.8) | 116(32.25-189) | 0.6641 |
| PCT (ng/mL) | 0.98(0.49-3.12) | 2.51(0.28-11.98) | 0.4372 |
| Scr (μmol/L) | 97(68-134) | 94.5(80-192.75) | 0.5676 |
| ESR (mm/h) | 37(9-41) | 8(7.5-8.5) | 0.4762 |
| WBC (x10^9/L) | 7.57(4.28-10.51) | 11.91(6.11-16.12) | 0.096 |
| Neutrophils (x10^9/L) | 8.19(3.41-10.63) | 12.45(9.48-15.19) | 0.0178 |
| Lymphocytes (x10^9/L) | 0.6(0.37-0.96) | 0.47(0.31-0.52) | 0.1864 |
| RBC (x10^12/L) | 2.92(2.53-3.43) | 2.48(2.22-2.9) | 0.0422 |
| HB (g/L) | 86(74.5-94.5) | 74(69.5-80) | 0.2594 |
| LDH (IU/L) | 322.5(225.25-455.5) | 390(227.75-1479.25) | 0.4572 |
| ALT (IU/L) | 17(14-53.5) | 55(27-265) | 0.0056 |
| AST (IU/L) | 40.5(21.25-58.5) | 73(30-160) | 0.03 |
| ALB (g/L) | 35(31-36.75) | 30(26-31) | 0.062 |
| Comorbidities |  |  |  |
| Acute kidney injury | 8(17.02%) | 5(27.77%) | 0.488 |
| Acute liver injury | 8(17.02%) | 5(27.77%) | 0.488 |
| Acute myocardial infarction | 1(2.12%) | 2(11.11%) | 0.183 |
| Acute respiratory failure | 7(14.89%) | 1(5.55%) | 0.426 |
| Source of infection |  |  |  |
| Digestive tract | 21(44.68%) | 2(11.11%) | 0.018 |
| Respiratory tract | 15(31,91%) | 11(61.11%) | 0.04 |
| Skin and skin structure | 0(0%) | 0(0%) | >0.9999 |
| CVC-related infection | 4(8.51%) | 0(0%) | 0.568 |
| Urinary tract | 0(0%) | 0(0%) | >0.9999 |
| Antibiotic therapy |  |  |  |
| Imipenem containing-regimen | 10(21.27%) | 5(27.77%) | 0.743 |
| Meropenem containing-regimen | 15(31.91%) | 7(38.88%) | 0.77 |
| Polymyxin containing-regimen | 2(4.25%) | 5(27.77%) | 0.014 |
| Tigecycline containing-regimen | 9(19.14%) | 0(0%) | 0.053 |
| Cefoperazone and Sulbactam containing-regimen | 9(19.14%) | 1(5.55%) | 0.261 |

CRP: C-reactive protein, PCT: Procalcitonin, Scr: serum creatinine, ESR: erythrocyte sedimentation Rate, WBC: white blood cells, LDH: lactic acid dehydrogenase, RBC: red blood cell, HB: Hemoglobin, ALT: glutamic pyruvic transaminase, AST: aspartate transaminase, ALB: albumin.

| **Table A4. Clinical characteristics of bloodstream infection with *Acinetobacter baumannii* in internal medical patients (90-day survival and 90-day mortality groups)** | | | |
| --- | --- | --- | --- |
| N (Total=65) | 90-day survival (N=32) | 90-day mortality (N=33) | *P* Value |
| Age (years) | 68(52.75-79.25) | 63(52-75) | 0.568 |
| BMI (Kg/m2) | 22(19.28-23.81) | 24.22(22.12-27.42) | 0.0067 |
| Sex |  |  | 0.2 |
| Male | 18(56.2%) | 24(72.7%) |  |
| Female | 14(43.7%) | 9(27.2%) |  |
| ICU admission | 18(56.2%) | 23(69.6%) | 0.3102 |
| Mechanical ventilation | 8(25%) | 7(21.2%) | 0.7746 |
| Length of ICU stay (days) | 16.5(0-59.75) | 12(0-31) | 0.807 |
| Length of hospital stay (days) | 51(29.5-95.5) | 29(12-39) | 0.0007 |
| CRP (mg/L) | 55(17.3-95) | 131(55-226) | 0.0025 |
| PCT (ng/mL) | 0.53(0.3-1.48) | 2.3(0.83-6.12) | 0.0301 |
| Scr (μmol/L) | 69.5(61.75-100) | 122(86-183.5) | 0.0067 |
| ESR (mm/h) | 39(30-50.75) | 7(6.5-8) | 0.0857 |
| WBC (x10^9/L) | 8.03(4.78-12.87) | 9.48(5-13.43) | 0.6702 |
| Neutrophils (x10^9/L) | 7.58(3.96-11.8) | 9.89(5.56-13) | 0.2178 |
| Lymphocytes (x10^9/L) | 0.69(0.45-1.06) | 0.47(0.31-0.6) | 0.0169 |
| RBC (x10^12/L) | 3.08(2.7-3.6) | 2.66(2.29-3.04) | 0.023 |
| HB (g/L) | 86(77-101) | 81(70-89) | 0.1352 |
| LDH (IU/L) | 282(171.5-383.25) | 405.5(244.5-474) | 0.1565 |
| ALT (IU/L) | 16(14-58) | 45.5(17.5-74.25) | 0.0486 |
| AST (IU/L) | 29(20-54) | 57(31-86.75) | 0.0209 |
| ALB (g/L) | 36(35-38) | 30(26.25-33) | 0.0015 |
| Comorbidities |  |  |  |
| Acute kidney injury | 3(9.3%) | 10(30.3%) | 0.06 |
| Acute liver injury | 5(15.6%) | 8(24.2%) | 0.5372 |
| Acute myocardial infarction | 0(0%) | 3(9.0%) | 0.2385 |
| Acute respiratory failure | 6(18.7%) | 1(3.0%) | 0.0539 |
| Source of infection |  |  |  |
| Digestive tract | 13(40.6%) | 10(30.3%) | 0.4431 |
| Respiratory tract | 12(37.5%) | 14(42.4%) | 0.8014 |
| Skin and skin structure | 0(0%) | 0(0%) | >0.9999 |
| CVC-related infection | 3(9.3%) | 1(3.0%) | 0.3553 |
| Urinary tract | 0(0%) | 0(0%) | >0.9999 |
| Antibiotic therapy |  |  |  |
| Imipenem containing-regimen | 6(18.7%) | 9(27.2%) | 0.558 |
| Meropenem containing-regimen | 10(31.2%) | 12(36.3%) | 0.7944 |
| Polymyxin containing-regimen | 2(6.2%) | 6(18.1%) | 0.2576 |
| Tigecycline containing-regimen | 5(15.6%) | 3(9.0%) | 0.4752 |
| Cefoperazone and Sulbactam containing-regimen | 5(15.6%) | 4(12.1%) | 0.733 |

CRP: C-reactive protein, PCT: Procalcitonin, Scr: serum creatinine, ESR: erythrocyte sedimentation Rate, WBC: white blood cells, LDH: lactic acid dehydrogenase, RBC: red blood cell, HB: Hemoglobin, ALT: glutamic pyruvic transaminase, AST: aspartate transaminase, ALB: albumin.

**Figure A5. The comparisons of some clinical characteristics of bloodstream infection with *Acinetobacter baumannii* in 30-day survival and 30-day mortality group (internal medical patients). * p<0.05, ** p<0.01, *** p<0.001.**


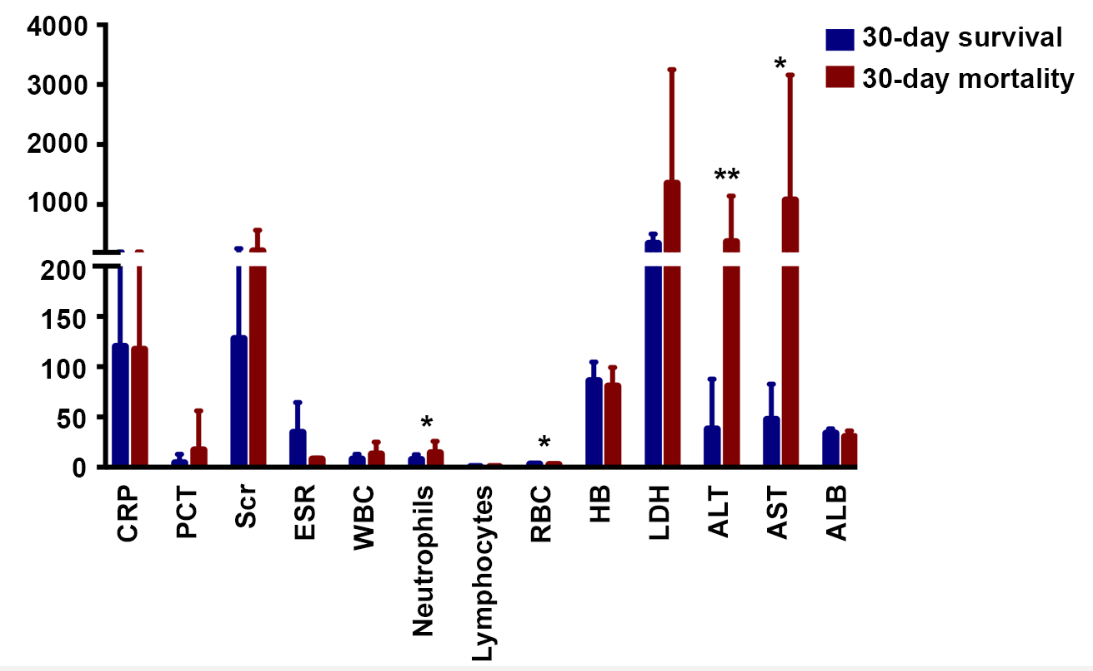


**Figure A6. The comparisons of some clinical characteristics of bloodstream infection with *Acinetobacter baumannii* in 90-day survival and 90-day mortality group (internal medical patients). * p<0.05, ** p<0.01, *** p<0.001.**


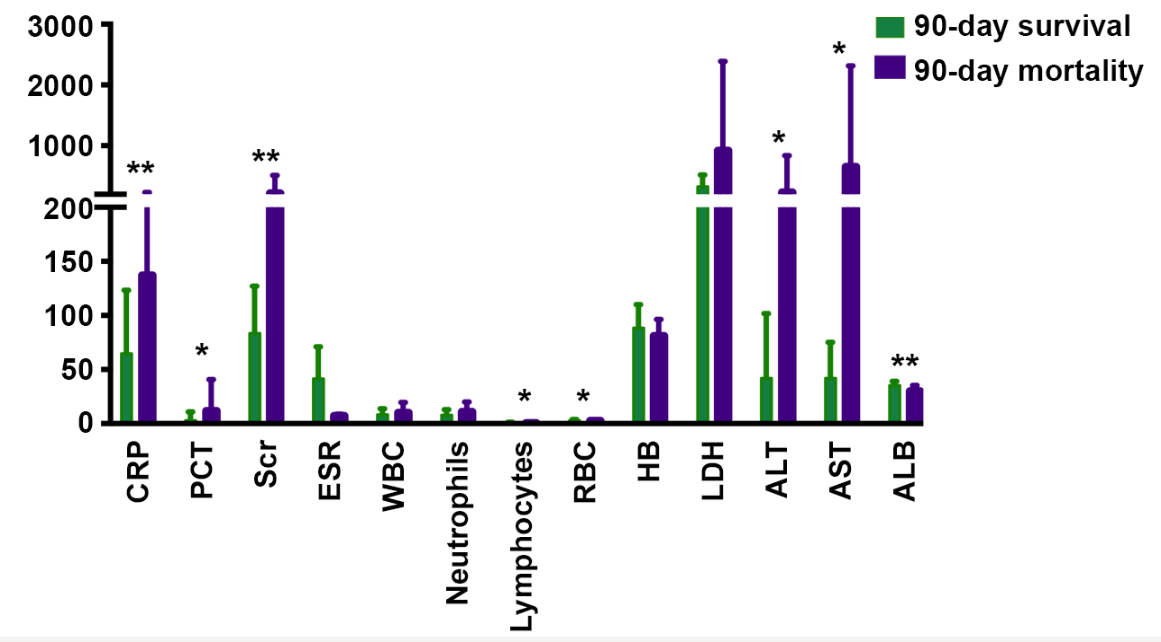

Supplement: Supplementary file 1 [file get_supplementary_file.php]
